# Supplementary material
Source: bioRxiv or medRxiv preprint supplement (https://www.medrxiv.org/highwire/filestream/70824/field_highwire_adjunct_files/3/2019.12.19.19015347-4.pdf)

Genotype

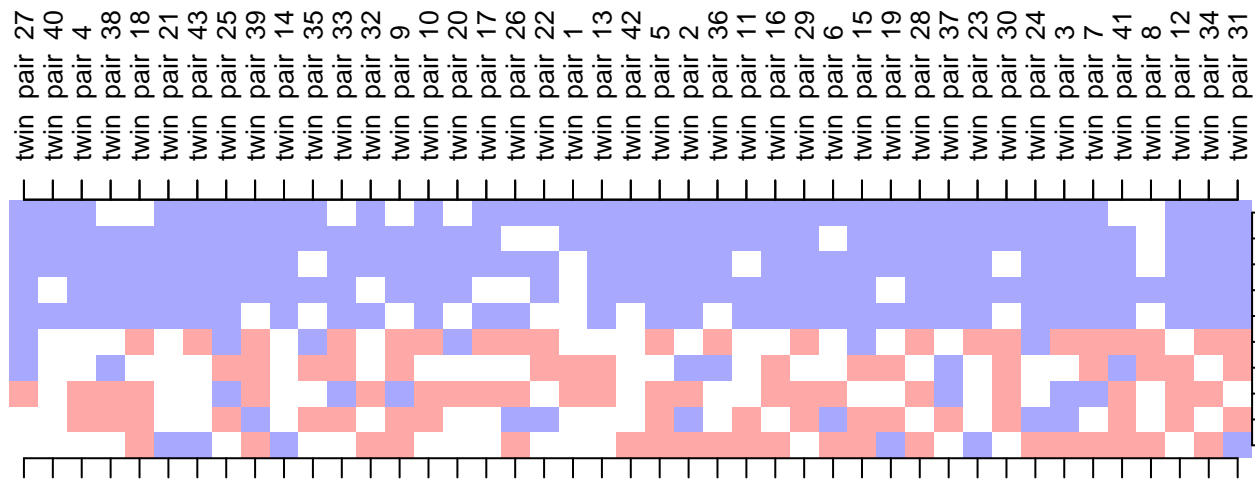

Key

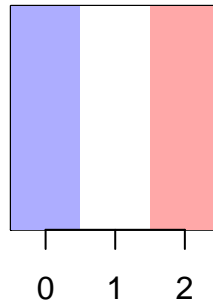

Supplement: Supplementary file [file 2019.12.19.19015347-4.pdf]
